# Supplementary material
Source: HighWire-hosted journal article supplement (https://www.rcpjournals.org/highwire/filestream/12482/field_highwire_adjunct_files/1/Wingfield_supplementary_material_S2.pdf)
Supplement: Wingfield_supplementary_material_S2.pdf [file Wingfield_supplementary_material_S2.pdf]

**Supplementary Table S2. Full sociodemographic and clinical details of people hospitalised with COVID-19 (n=94)**

|                                                                                             | Numbers (n=94) | Proportion (%) |
|---------------------------------------------------------------------------------------------|----------------|----------------|
| <b>COVID-19 status</b>                                                                      |                |                |
| Confirmed                                                                                   | 87             | 92.6           |
| Suspected                                                                                   | 7              | 7.4            |
| <b>Data collection</b>                                                                      |                |                |
| Pre-discharge                                                                               | 22             | 23.4           |
| Post-discharge                                                                              | 72             | 76.6           |
| <b>Sex</b>                                                                                  |                |                |
| Female                                                                                      | 45             | 47.9           |
| Male                                                                                        | 49             | 52.1           |
| <b>Age in years</b>                                                                         |                |                |
| Median                                                                                      | 59 years       | 46–71 (IQR)    |
| <20                                                                                         | 2              | 2.1            |
| 20–29                                                                                       | 6              | 6.4            |
| 30–39                                                                                       | 8              | 8.5            |
| 40–49                                                                                       | 14             | 14.9           |
| 50–59                                                                                       | 18             | 19.1           |
| 60–69                                                                                       | 18             | 19.1           |
| 70–79                                                                                       | 22             | 23.5           |
| 80–89                                                                                       | 6              | 6.4            |
| <b>Ethnicity</b>                                                                            |                |                |
| Black, Asian and minority ethnic (BAME)                                                     | 10             | 10.6           |
| <b>Body mass index (BMI)</b>                                                                |                |                |
| <18.5                                                                                       | 2              | 2.1            |
| 18.5–24.9                                                                                   | 18             | 19.2           |
| 25–29.9                                                                                     | 32             | 34.1           |
| 30–34.9                                                                                     | 16             | 17.0           |
| 35–40                                                                                       | 10             | 10.6           |
| >40                                                                                         | 6              | 6.4            |
| Unknown                                                                                     | 10             | 10.6           |
| <b>Relevant comorbidities</b>                                                               |                |                |
| <b>One or more comorbidities (including obesity)</b>                                        | 73             | 77.7           |
| Chronic lung disease                                                                        | 36             | 38.3           |
| Ex- or current smoker                                                                       | 31             | 33             |
| Hypertension                                                                                | 29             | 30.9           |
| Diabetes mellitus                                                                           | 18             | 19.1           |
| Vasculopathy (cardiovascular disease, cerebrovascular disease, peripheral vascular disease) | 15             | 16             |
| Chronic kidney disease                                                                      | 13             | 13.8           |
| Immunosuppressive therapy                                                                   | 9              | 9.6            |
| People living with HIV                                                                      | 2              | 2.1            |
| Previous venous thromboembolism                                                             | 1              | 1.1            |
| <b>Month of admission</b>                                                                   |                |                |
| March 2020                                                                                  | 25             | 26.6           |
| April 2020                                                                                  | 63             | 67             |
| May 2020                                                                                    | 2              | 2.1            |
| June 2020                                                                                   | 4              | 4.3            |
| <b>Intra-hospital ward transfer during admission</b>                                        |                |                |
| No transfer                                                                                 | 67             | 71.3           |
| Moved ward once                                                                             | 22             | 23.4           |
| Moved ward more than once                                                                   | 4              | 4.3            |
